# Supplementary material for: Theoretical proposal for an organometallic route to cis-peptides
Source: Royal Society of Chemistry journal article supplement (doi:10.1039/b904139g), 2009-01-01
Supplement: b904139g.pdf [file b904139g.pdf]

FIGURE 3a

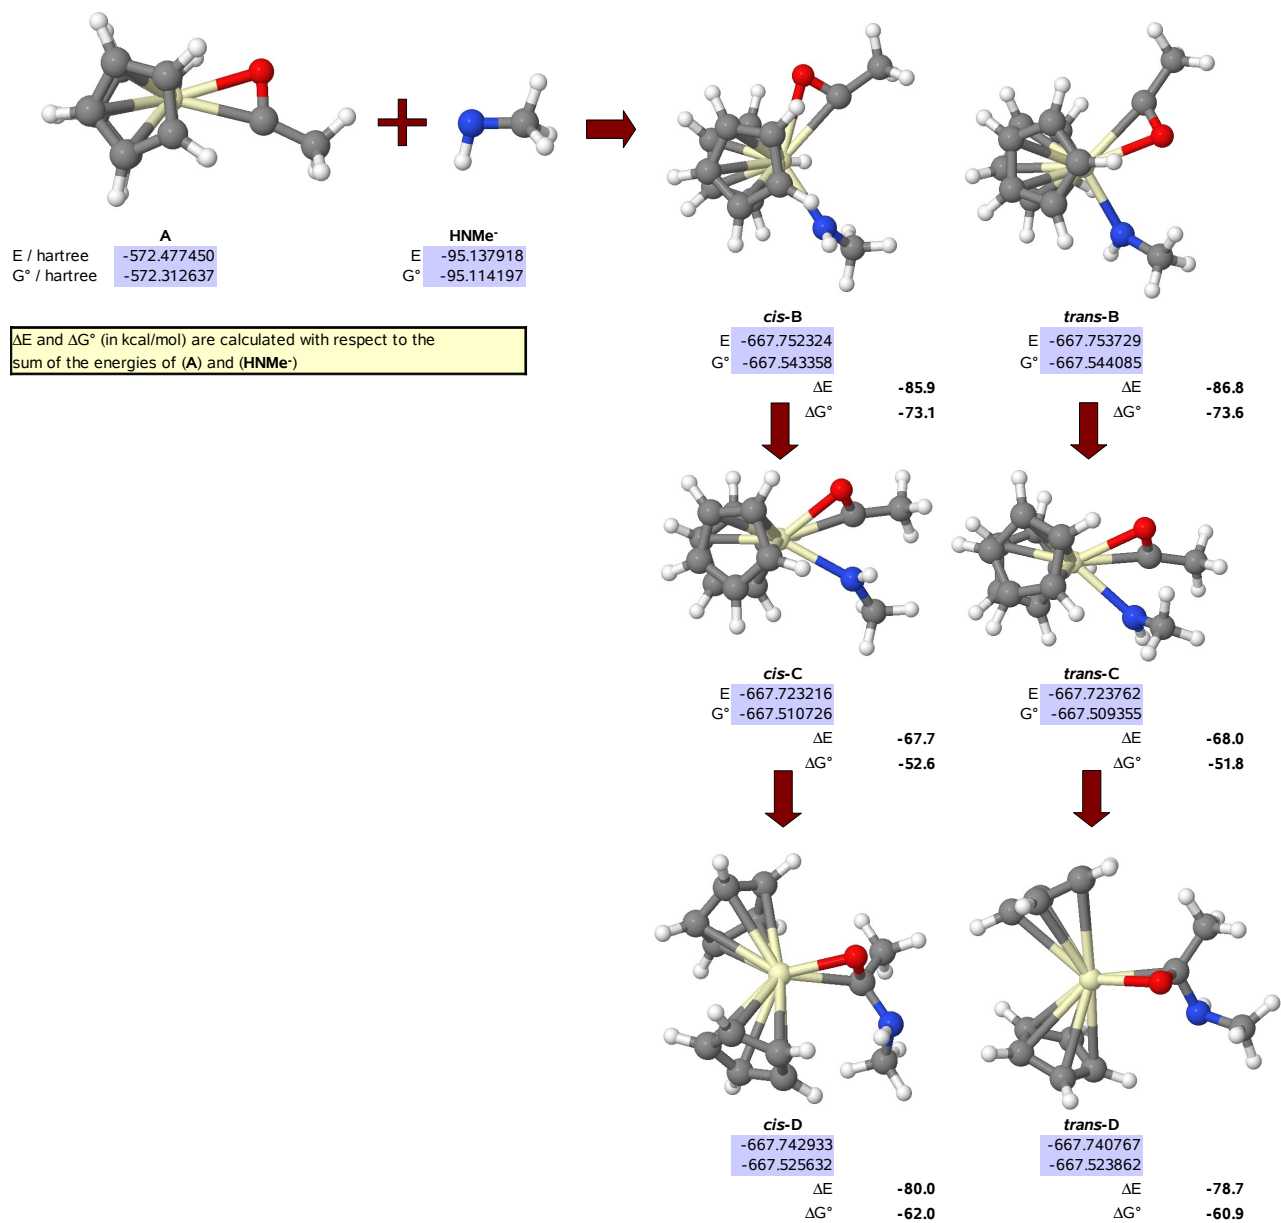

FIGURE 3b

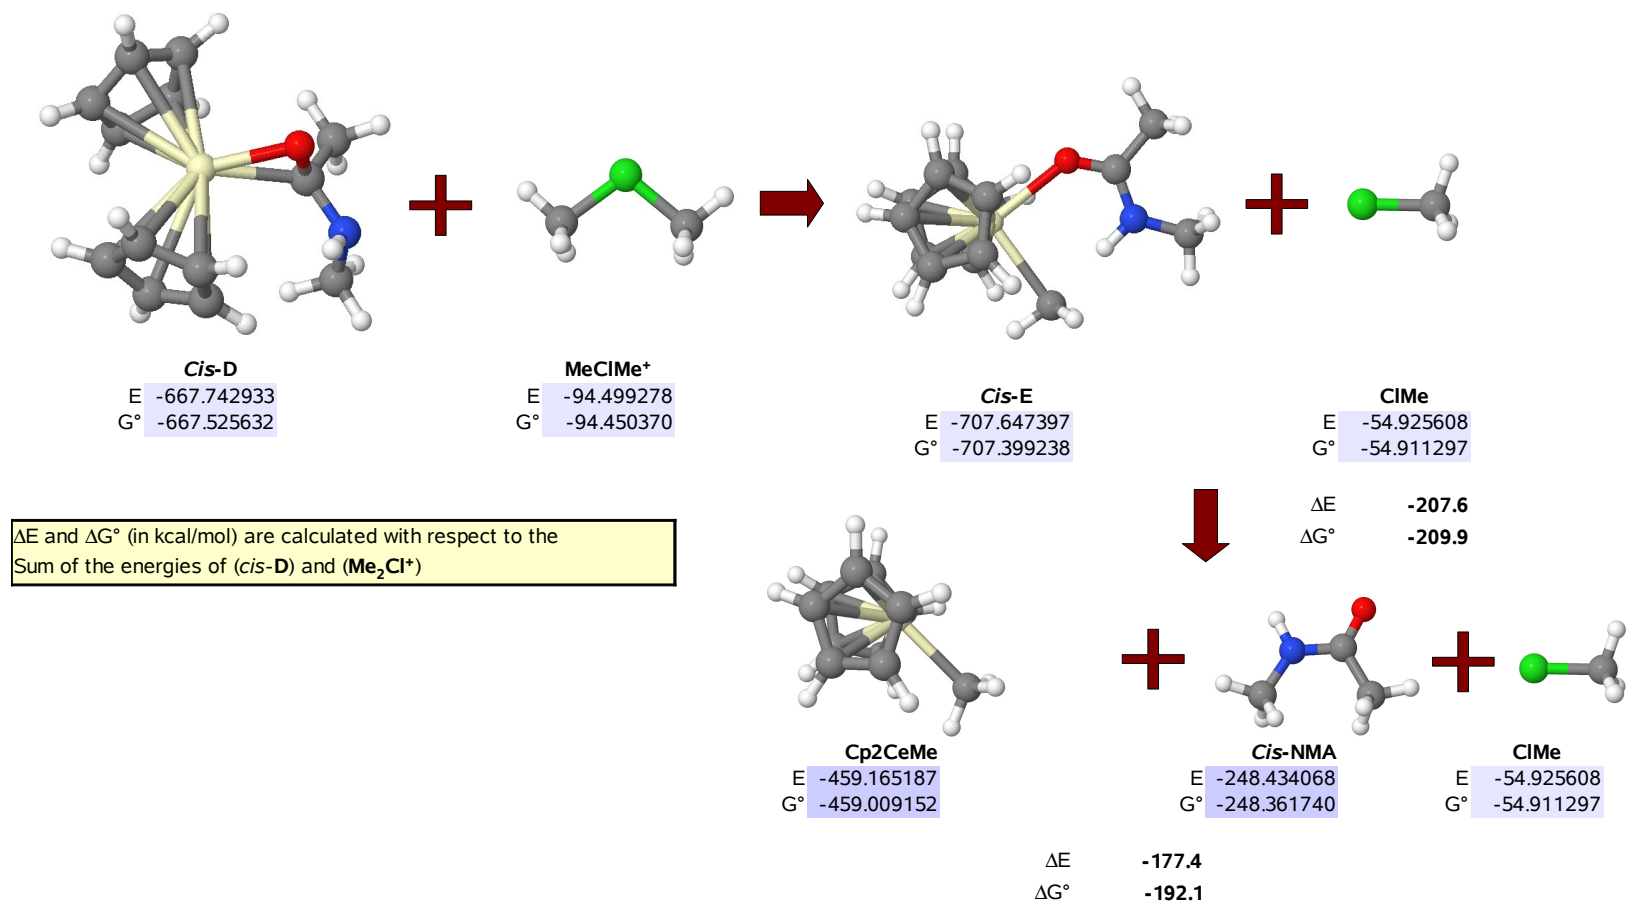

### COORDINATES

|         |           |           |           |
|---------|-----------|-----------|-----------|
| A       |           |           |           |
| C       | 0.114879  | 1.611048  | 1.720947  |
| C       | -1.110832 | 0.988957  | 2.076158  |
| C       | -0.838956 | -0.363440 | 2.392677  |
| C       | 0.555365  | -0.578592 | 2.238522  |
| C       | 1.145450  | 0.643613  | 1.829616  |
| Ce      | -0.387245 | -0.179171 | -0.401322 |
| C       | 0.040845  | 0.437568  | -3.133088 |
| C       | 0.350391  | -0.939728 | -3.031130 |
| C       | 1.542804  | -1.066671 | -2.272097 |
| C       | 1.971512  | 0.234299  | -1.907405 |
| C       | 1.039085  | 1.164227  | -2.432221 |
| C       | -2.804143 | 0.045304  | -0.956534 |
| O       | -2.599539 | -1.181179 | -0.776804 |
| H       | 1.108250  | 2.244080  | -2.360318 |
| H       | -0.792162 | 0.864752  | -3.678056 |
| H       | 2.872229  | 0.477544  | -1.355870 |
| H       | 2.065666  | -1.992205 | -2.055095 |
| H       | -0.207470 | -1.751935 | -3.483229 |
| H       | 0.248202  | 2.656841  | 1.466752  |
| H       | 2.202447  | 0.817378  | 1.665158  |
| H       | 1.085749  | -1.501040 | 2.450468  |
| H       | -1.564451 | -1.096601 | 2.726459  |
| H       | -2.078270 | 1.473344  | 2.128850  |
| C       | -4.195111 | 0.479108  | -1.311195 |
| H       | -4.900061 | -0.357887 | -1.375375 |
| H       | -4.537581 | 1.206728  | -0.565775 |
| H       | -4.161953 | 1.020605  | -2.264114 |
| -----   |           |           |           |
| HNMe-   |           |           |           |
| N       | 0.044555  | 0.000000  | -0.058026 |
| C       | -0.024050 | 0.000000  | 1.346923  |
| H       | 1.004321  | 0.000000  | 1.782570  |
| H       | -0.517214 | 0.883674  | 1.907058  |
| H       | -0.517214 | -0.883674 | 1.907058  |
| H       | -0.940751 | 0.000000  | -0.372582 |
| -----   |           |           |           |
| cis-B   |           |           |           |
| C       | 0.763895  | -0.190579 | 1.915894  |
| C       | -0.027498 | 0.817234  | 2.519171  |
| C       | -1.341775 | 0.311586  | 2.662980  |
| C       | -1.364089 | -1.006863 | 2.148954  |
| C       | -0.063611 | -1.317337 | 1.684046  |
| Ce      | -0.995922 | 0.639153  | -0.235074 |
| O       | -2.088541 | -1.538281 | -1.157239 |
| C       | -2.987077 | -0.671286 | -1.264851 |
| N       | -1.942528 | 2.726908  | 0.376381  |
| C       | -2.538664 | 3.805980  | -0.369925 |
| C       | 0.189745  | 0.249006  | -2.891180 |
| C       | 1.279733  | 0.204294  | -1.993901 |
| C       | 1.467787  | 1.510203  | -1.468231 |
| C       | 0.497051  | 2.359149  | -2.049628 |
| C       | -0.300222 | 1.578712  | -2.920448 |
| H       | -2.126306 | 2.867081  | 1.366944  |
| H       | 0.367162  | 3.413521  | -1.838226 |
| H       | -1.130128 | 1.937918  | -3.519175 |
| H       | 2.235615  | 1.810500  | -0.763253 |
| H       | 1.871906  | -0.672277 | -1.753473 |
| H       | -0.215921 | -0.592146 | -3.440887 |
| H       | 1.821309  | -0.117913 | 1.685529  |
| H       | 0.241614  | -2.254023 | 1.231048  |
| H       | -2.225712 | -1.663364 | 2.108496  |
| H       | -2.184899 | 0.841246  | 3.092390  |
| H       | 0.312536  | 1.802774  | 2.816248  |
| C       | -4.315052 | -1.153163 | -1.825068 |
| H       | -3.642991 | 3.881966  | -0.279523 |
| H       | -2.146909 | 4.814049  | -0.115007 |
| H       | -2.338618 | 3.672138  | -1.442528 |
| H       | -4.317898 | -2.229119 | -2.056507 |
| H       | -5.109687 | -0.920654 | -1.104609 |
| H       | -4.546890 | -0.575484 | -2.729363 |
| -----   |           |           |           |
| trans-B |           |           |           |
| C       | 0.753029  | -0.990975 | 1.336318  |
| C       | 0.635670  | 0.215908  | 2.067841  |
| C       | -0.648778 | 0.239909  | 2.669483  |
| C       | -1.326666 | -0.942398 | 2.296627  |
| C       | -0.461707 | -1.703208 | 1.470737  |

|    |           |           |           |
|----|-----------|-----------|-----------|
| Ce | -1.175511 | 0.657393  | -0.159063 |
| O  | -3.480736 | -0.504590 | -0.219012 |
| C  | -2.864349 | -1.002301 | -1.187666 |
| N  | -2.410495 | 2.610219  | 0.330678  |
| C  | -3.615201 | 2.806834  | 1.100635  |
| C  | -0.154145 | 1.088768  | -2.847672 |
| C  | 0.955509  | 0.569742  | -2.132789 |
| C  | 1.397150  | 1.565814  | -1.229482 |
| C  | 0.552015  | 2.691498  | -1.372276 |
| C  | -0.403004 | 2.398155  | -2.377441 |
| H  | -2.037651 | 3.513214  | 0.047862  |
| H  | 0.630545  | 3.621131  | -0.819127 |
| H  | -1.196066 | 3.055813  | -2.713390 |
| H  | 2.233053  | 1.478511  | -0.544865 |
| H  | 1.400844  | -0.409589 | -2.271870 |
| H  | -0.712135 | 0.570428  | -3.618800 |
| H  | 1.620321  | -1.308751 | 0.767824  |
| H  | -0.689313 | -2.667135 | 1.029236  |
| H  | -2.338330 | -1.212705 | 2.575973  |
| H  | -1.043060 | 1.031659  | 3.296217  |
| H  | 1.403294  | 0.974625  | 2.175870  |
| C  | -3.630680 | -2.017002 | -2.019251 |
| H  | -3.472253 | 3.345593  | 2.061612  |
| H  | -4.413396 | 3.359056  | 0.562828  |
| H  | -4.050422 | 1.832309  | 1.359105  |
| H  | -4.650516 | -2.191149 | -1.645559 |
| H  | -3.668313 | -1.667842 | -3.059170 |
| H  | -3.070468 | -2.960769 | -2.034195 |

-----  
cis-C

|    |           |           |           |
|----|-----------|-----------|-----------|
| C  | 1.173434  | -0.013233 | 1.858550  |
| C  | 0.189274  | 0.824872  | 2.428406  |
| C  | -0.989831 | 0.055449  | 2.611104  |
| C  | -0.736367 | -1.251169 | 2.141634  |
| C  | 0.599822  | -1.291995 | 1.662557  |
| Ce | -0.916534 | 0.321718  | -0.290569 |
| O  | -3.019000 | -0.830904 | -0.336942 |
| C  | -3.126828 | 0.165926  | -1.184020 |
| N  | -2.890767 | 1.792838  | 0.061476  |
| C  | -3.269329 | 3.054101  | -0.520249 |
| C  | 0.702409  | -0.117779 | -2.671907 |
| C  | 1.677384  | 0.250616  | -1.707044 |
| C  | 1.505779  | 1.620100  | -1.415267 |
| C  | 0.424187  | 2.103143  | -2.197500 |
| C  | -0.060374 | 1.032892  | -2.985731 |
| H  | -3.514706 | 1.538517  | 0.824614  |
| H  | 0.054928  | 3.123237  | -2.214863 |
| H  | -0.887558 | 1.077717  | -3.682378 |
| H  | 2.097375  | 2.201745  | -0.716568 |
| H  | 2.424910  | -0.404493 | -1.273638 |
| H  | 0.589051  | -1.098862 | -3.122901 |
| H  | 2.184758  | 0.276963  | 1.597085  |
| H  | 1.107300  | -2.164178 | 1.262000  |
| H  | -1.446478 | -2.070008 | 2.132486  |
| H  | -1.924224 | 0.409949  | 3.030643  |
| H  | 0.319665  | 1.865075  | 2.709176  |
| C  | -4.510044 | 0.380139  | -1.746268 |
| H  | -4.361810 | 3.191571  | -0.626895 |
| H  | -2.896802 | 3.942199  | 0.026518  |
| H  | -2.848280 | 3.121719  | -1.535517 |
| H  | -5.298759 | 0.239385  | -0.987285 |
| H  | -4.617929 | 1.365172  | -2.210316 |
| H  | -4.675605 | -0.374599 | -2.528102 |

-----  
trans-C

|    |           |           |           |
|----|-----------|-----------|-----------|
| C  | 1.231465  | -0.290369 | 1.755683  |
| C  | 0.506267  | 0.793598  | 2.295195  |
| C  | -0.794418 | 0.329110  | 2.626958  |
| C  | -0.871333 | -1.038885 | 2.287096  |
| C  | 0.376977  | -1.420208 | 1.730156  |
| Ce | -0.915565 | 0.272811  | -0.290748 |
| O  | -2.976232 | -0.978554 | -0.331672 |
| C  | -3.105858 | 0.024341  | -1.172286 |
| N  | -2.960678 | 1.654930  | 0.036803  |
| C  | -3.921190 | 1.535491  | 1.104181  |
| C  | 0.658165  | 0.045976  | -2.730481 |
| C  | 1.641904  | 0.395524  | -1.767176 |
| C  | 1.423937  | 1.736827  | -1.388205 |
| C  | 0.304227  | 2.220605  | -2.114042 |
| C  | -0.157487 | 1.180706  | -2.955253 |

|   |           |           |           |
|---|-----------|-----------|-----------|
| H | -3.198020 | 2.416992  | -0.590078 |
| H | -0.106116 | 3.223760  | -2.059634 |
| H | -1.002006 | 1.233009  | -3.630287 |
| H | 2.008926  | 2.298283  | -0.668047 |
| H | 2.429399  | -0.251556 | -1.396754 |
| H | 0.573147  | -0.909247 | -3.239358 |
| H | 2.258122  | -0.260152 | 1.408591  |
| H | 0.647131  | -2.417970 | 1.397506  |
| H | -1.742403 | -1.673937 | 2.395755  |
| H | -1.589260 | 0.919384  | 3.068290  |
| H | 0.884324  | 1.798037  | 2.455911  |
| C | -4.485716 | 0.192918  | -1.761837 |
| H | -3.666726 | 2.106514  | 2.015867  |
| H | -4.943897 | 1.837726  | 0.814933  |
| H | -3.974937 | 0.473204  | 1.396857  |
| H | -5.282775 | 0.068971  | -1.009165 |
| H | -4.603156 | 1.161083  | -2.261517 |
| H | -4.631106 | -0.593177 | -2.515955 |

-----  
cis-D

|    |           |           |           |
|----|-----------|-----------|-----------|
| C  | 0.144384  | 1.701406  | 1.882272  |
| C  | -0.960224 | 1.000508  | 2.427721  |
| C  | -0.553598 | -0.329660 | 2.680478  |
| C  | 0.805502  | -0.453808 | 2.287962  |
| C  | 1.237971  | 0.806654  | 1.808420  |
| Ce | -0.636028 | -0.193809 | -0.224557 |
| C  | -0.182532 | 0.712367  | -2.943954 |
| C  | -0.115019 | -0.698750 | -3.031235 |
| C  | 1.075740  | -1.121518 | -2.389216 |
| C  | 1.752465  | 0.030630  | -1.916912 |
| C  | 0.971986  | 1.161659  | -2.252500 |
| N  | -4.024702 | 0.475009  | 0.529733  |
| C  | -4.171599 | 1.902959  | 0.712609  |
| C  | -3.115582 | 0.091313  | -0.563067 |
| O  | -2.634684 | -1.191138 | -0.350410 |
| H  | -3.620919 | 0.069040  | 1.369600  |
| H  | 1.222492  | 2.195420  | -2.038043 |
| H  | -0.972229 | 1.337757  | -3.341879 |
| H  | 2.702933  | 0.041873  | -1.394537 |
| H  | 1.430846  | -2.144480 | -2.311802 |
| H  | -0.850498 | -1.343194 | -3.499078 |
| H  | 0.153947  | 2.748315  | 1.598281  |
| H  | 2.231396  | 1.041668  | 1.442545  |
| H  | 1.420538  | -1.342758 | 2.385697  |
| H  | -1.169724 | -1.114508 | 3.106040  |
| H  | -1.941218 | 1.417154  | 2.620269  |
| C  | -3.826931 | 0.227944  | -1.900040 |
| H  | -4.759494 | 2.109996  | 1.617064  |
| H  | -3.204912 | 2.445194  | 0.777978  |
| H  | -4.719965 | 2.337892  | -0.131869 |
| H  | -4.722316 | -0.419996 | -1.940635 |
| H  | -4.147951 | 1.259768  | -2.091770 |
| H  | -3.156567 | -0.063871 | -2.714070 |

-----  
trans-D

|    |           |           |           |
|----|-----------|-----------|-----------|
| C  | 1.319181  | 1.108525  | 1.769983  |
| C  | 0.062841  | 1.682378  | 2.094656  |
| C  | -0.774229 | 0.654045  | 2.592883  |
| C  | -0.045444 | -0.555285 | 2.558054  |
| C  | 1.252232  | -0.275374 | 2.047609  |
| Ce | -0.566052 | 0.041772  | -0.239397 |
| O  | -2.640568 | -0.720845 | -0.564415 |
| C  | -2.952908 | 0.637353  | -0.555822 |
| N  | -3.673117 | 0.985919  | 0.682628  |
| C  | -5.001903 | 0.398593  | 0.830475  |
| C  | -0.125862 | -0.155247 | -3.105034 |
| C  | 0.991883  | -0.822970 | -2.546982 |
| C  | 1.824807  | 0.148450  | -1.936113 |
| C  | 1.211921  | 1.411787  | -2.101578 |
| C  | 0.004426  | 1.225429  | -2.824143 |
| H  | -3.731151 | 1.997547  | 0.744493  |
| H  | 1.604852  | 2.361144  | -1.753040 |
| H  | -0.690723 | 2.003247  | -3.116798 |
| H  | 2.766060  | -0.043173 | -1.432457 |
| H  | 1.198087  | -1.886902 | -2.613784 |
| H  | -0.948810 | -0.622107 | -3.633456 |
| H  | 2.181853  | 1.637617  | 1.379466  |
| H  | 2.061613  | -0.988971 | 1.930408  |
| H  | -0.408497 | -1.524852 | 2.884799  |
| H  | -1.816117 | 0.762376  | 2.866695  |

|   |           |           |           |
|---|-----------|-----------|-----------|
| H | -0.202019 | 2.730806  | 2.007541  |
| C | -3.682701 | 1.044595  | -1.833227 |
| H | -5.401620 | 0.614786  | 1.830881  |
| H | -5.758937 | 0.726426  | 0.091896  |
| H | -4.898255 | -0.686507 | 0.734633  |
| H | -4.633660 | 0.496933  | -1.979600 |
| H | -3.912791 | 2.119755  | -1.844812 |
| H | -3.058957 | 0.833024  | -2.707842 |

ClMe2+

|    |           |           |           |
|----|-----------|-----------|-----------|
| Cl | -0.056029 | 0.000000  | -0.039443 |
| C  | 0.018148  | 0.000000  | 1.803956  |
| C  | 1.706837  | 0.000000  | -0.584128 |
| H  | 1.626195  | 0.000000  | -1.671384 |
| H  | 2.152759  | 0.915165  | -0.199217 |
| H  | 2.152759  | -0.915164 | -0.199216 |
| H  | -1.033809 | 0.000001  | 2.090412  |
| H  | 0.529761  | -0.915173 | 2.095844  |
| H  | 0.529762  | 0.915172  | 2.095844  |

cis-E

|    |           |           |           |
|----|-----------|-----------|-----------|
| C  | 1.257894  | -0.222749 | -0.893772 |
| C  | 0.417607  | -0.471678 | 0.219699  |
| C  | 1.127965  | -0.110737 | 1.393034  |
| C  | 2.403933  | 0.363550  | 1.005875  |
| C  | 2.483520  | 0.299262  | -0.407799 |
| Ce | 0.598964  | 2.361094  | 0.063818  |
| C  | -0.674180 | 3.481848  | 3.085598  |
| C  | -1.744323 | 3.554429  | 4.141743  |
| C  | -0.859972 | 4.501380  | -1.147782 |
| C  | -1.466738 | 3.321660  | -1.648962 |
| C  | -0.539595 | 2.684428  | -2.509103 |
| C  | 0.642231  | 3.469308  | -2.536099 |
| C  | 0.440158  | 4.595150  | -1.698742 |
| N  | 0.449779  | 4.178096  | 3.254718  |
| C  | 0.767100  | 5.020893  | 4.389104  |
| O  | -0.847289 | 2.776025  | 2.061276  |
| H  | 1.142153  | 4.072130  | 2.485507  |
| H  | 1.019137  | -0.428382 | -1.930701 |
| H  | -0.577561 | -0.901468 | 0.183234  |
| H  | 3.347107  | 0.561583  | -1.008901 |
| H  | 3.189007  | 0.701635  | 1.670982  |
| H  | 0.765423  | -0.209798 | 2.409841  |
| H  | -2.475574 | 2.984188  | -1.437522 |
| H  | -0.714869 | 1.777033  | -3.075281 |
| H  | 1.526125  | 3.268546  | -3.131435 |
| H  | 1.151271  | 5.392880  | -1.522922 |
| H  | -1.324468 | 5.222668  | -0.484933 |
| H  | 1.726081  | 5.502755  | 4.194595  |
| H  | 0.017619  | 5.805872  | 4.537214  |
| H  | 0.858493  | 4.445150  | 5.317406  |
| H  | -1.353506 | 3.253217  | 5.118964  |
| H  | -2.121476 | 4.577842  | 4.240645  |
| H  | -2.564316 | 2.895522  | 3.859665  |
| C  | 2.491809  | 3.870824  | 1.021032  |
| H  | 3.100505  | 3.639070  | 0.123970  |
| H  | 2.440821  | 4.970638  | 1.025344  |
| H  | 3.138026  | 3.568875  | 1.859610  |

Cp2CeMe

|    |           |           |           |
|----|-----------|-----------|-----------|
| C  | 0.861869  | 1.056978  | -1.997580 |
| C  | 1.507882  | -0.206288 | -1.946248 |
| C  | 0.609870  | -1.175056 | -2.454872 |
| C  | -0.588351 | -0.509523 | -2.828625 |
| C  | -0.430190 | 0.867962  | -2.554385 |
| Ce | -0.519597 | -0.312321 | 0.007851  |
| C  | 0.817906  | -1.025491 | 2.410223  |
| C  | 1.498426  | 0.116935  | 1.927403  |
| C  | 0.621757  | 1.228515  | 2.041818  |
| C  | -0.594751 | 0.773622  | 2.611905  |
| C  | -0.477603 | -0.619203 | 2.829660  |
| C  | -2.814682 | 0.701590  | -0.019873 |
| H  | 2.519224  | 0.145597  | 1.564632  |
| H  | 0.863243  | 2.256103  | 1.793751  |
| H  | -1.457823 | 1.384411  | 2.843744  |
| H  | -1.228615 | -1.255366 | 3.285814  |
| H  | 1.232294  | -2.024836 | 2.493354  |
| H  | 2.521345  | -0.390168 | -1.608763 |
| H  | 0.821793  | -2.231016 | -2.588082 |
| H  | -1.459392 | -0.969520 | -3.281967 |

|   |           |          |           |
|---|-----------|----------|-----------|
| H | -1.164088 | 1.641706 | -2.741777 |
| H | 1.303446  | 2.007672 | -1.720447 |
| H | -3.377459 | 0.410782 | -0.920783 |
| H | -3.411529 | 0.387756 | 0.851248  |
| H | -2.809911 | 1.802115 | -0.004604 |

-----  
cis-NMA

|   |           |           |           |
|---|-----------|-----------|-----------|
| C | 0.747583  | 1.347623  | -0.020668 |
| C | 0.618755  | -0.163069 | -0.003137 |
| O | 1.589530  | -0.905316 | 0.037964  |
| N | -0.653752 | -0.665216 | -0.057679 |
| C | -1.890663 | 0.076447  | 0.036983  |
| H | -0.688187 | -1.671575 | 0.018718  |
| H | -1.873422 | 0.954441  | -0.615173 |
| H | 0.208714  | 1.810022  | 0.813109  |
| H | 1.806092  | 1.594926  | 0.052710  |
| H | 0.345540  | 1.769424  | -0.948336 |
| H | -2.713325 | -0.560128 | -0.297472 |
| H | -2.117104 | 0.412788  | 1.058791  |

-----  
trans-NMA

|   |           |           |           |
|---|-----------|-----------|-----------|
| C | 1.809507  | -0.562652 | 0.000001  |
| C | 0.478659  | 0.165821  | -0.000004 |
| O | 0.412475  | 1.387069  | -0.000013 |
| N | -0.624638 | -0.638687 | 0.000003  |
| C | -1.966597 | -0.104359 | 0.000002  |
| H | -0.497358 | -1.637402 | 0.000011  |
| H | -2.523732 | -0.416339 | -0.890833 |
| H | 2.378363  | -0.251351 | 0.880071  |
| H | 2.378371  | -0.251348 | -0.880064 |
| H | 1.723813  | -1.653084 | -0.000001 |
| H | -2.523723 | -0.416311 | 0.890853  |
| H | -1.876523 | 0.983161  | -0.000015 |

-----  
ClMe

|    |           |           |           |
|----|-----------|-----------|-----------|
| Cl | -0.000006 | 0.000000  | -0.027411 |
| C  | -0.000005 | 0.000000  | 1.774451  |
| H  | 1.034525  | 0.000000  | 2.113996  |
| H  | -0.517257 | 0.895927  | 2.113982  |
| H  | -0.517257 | -0.895927 | 2.113982  |
